# Supplementary material for: Gating pore currents are defects in common with two Nav1.5 mutations in patients with mixed arrhythmias and dilated cardiomyopathy
Source: PubMed Central journal article supplement — J Gen Physiol. 2015 Feb;145(2):93–106. doi: 10.1085/jgp.201411304 (PMC4306709; doi:10.1085/jgp.201411304), 2015-02
Supplement: supp_jgp.201411304_JGP_201411304_sm.pdf [file supp_jgp.201411304_JGP_201411304_sm.pdf]

Moreau et al., <http://www.jgp.org/cgi/content/full/jgp.201411304/DC1>

The PDB files are available for download as a ZIP file and represent the models of Na<sub>v</sub>1.5 WT or mutant channels (R222Q and R225W) at different states, at the end of the molecular dynamics simulation process. WT channel is shown at both β and γ states (Nav15\_DI\_β\_WT and Nav15\_DI\_gamma\_WT, respectively). Na<sub>v</sub>1.5 R222Q channel is shown in the γ state (Nav15\_DI\_gamma\_R222Q). Na<sub>v</sub>1.5 R225W channel is shown in the β state (Nav15\_DI\_β\_R225W). All PDBs contain the complete system, including the protein, lipids, water molecules, and ions.

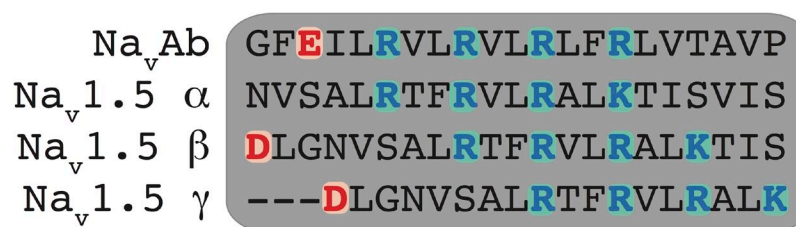

**Figure S1.** Sequence alignments used to build the homology model. The alignments of the S4 segments used to build the homology model in three states (α, β, and γ) are presented. Positive gating charges are highlighted in blue, and negative charges are highlighted in red.

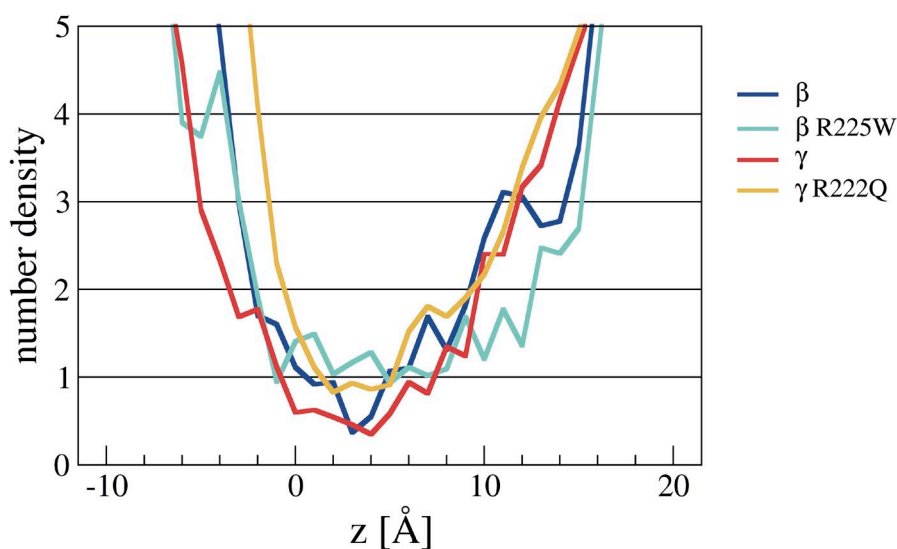

**Figure S2.** Water density profiles of the Na<sub>v</sub>1.5 WT and mutant channels. Water density profiles along the main axis of the VSD in the β and γ WT channels (dark blue and red) and the β R225W mutant (light blue) and γ R222Q mutant channels (orange). The histograms were built using a 1-Å grid, and the averages were calculated from the last 10 ns of the trajectories. 0 corresponds to the position of the Cα of Y168 of S2. Note that, for the WT system, the water number density is <1 at the constriction, indicating a disruption of the water-accessible volume. For the two mutants, however, the water density remains at or above one molecule, indicating a continuous water-accessible volume bridging the internal and external crevices.

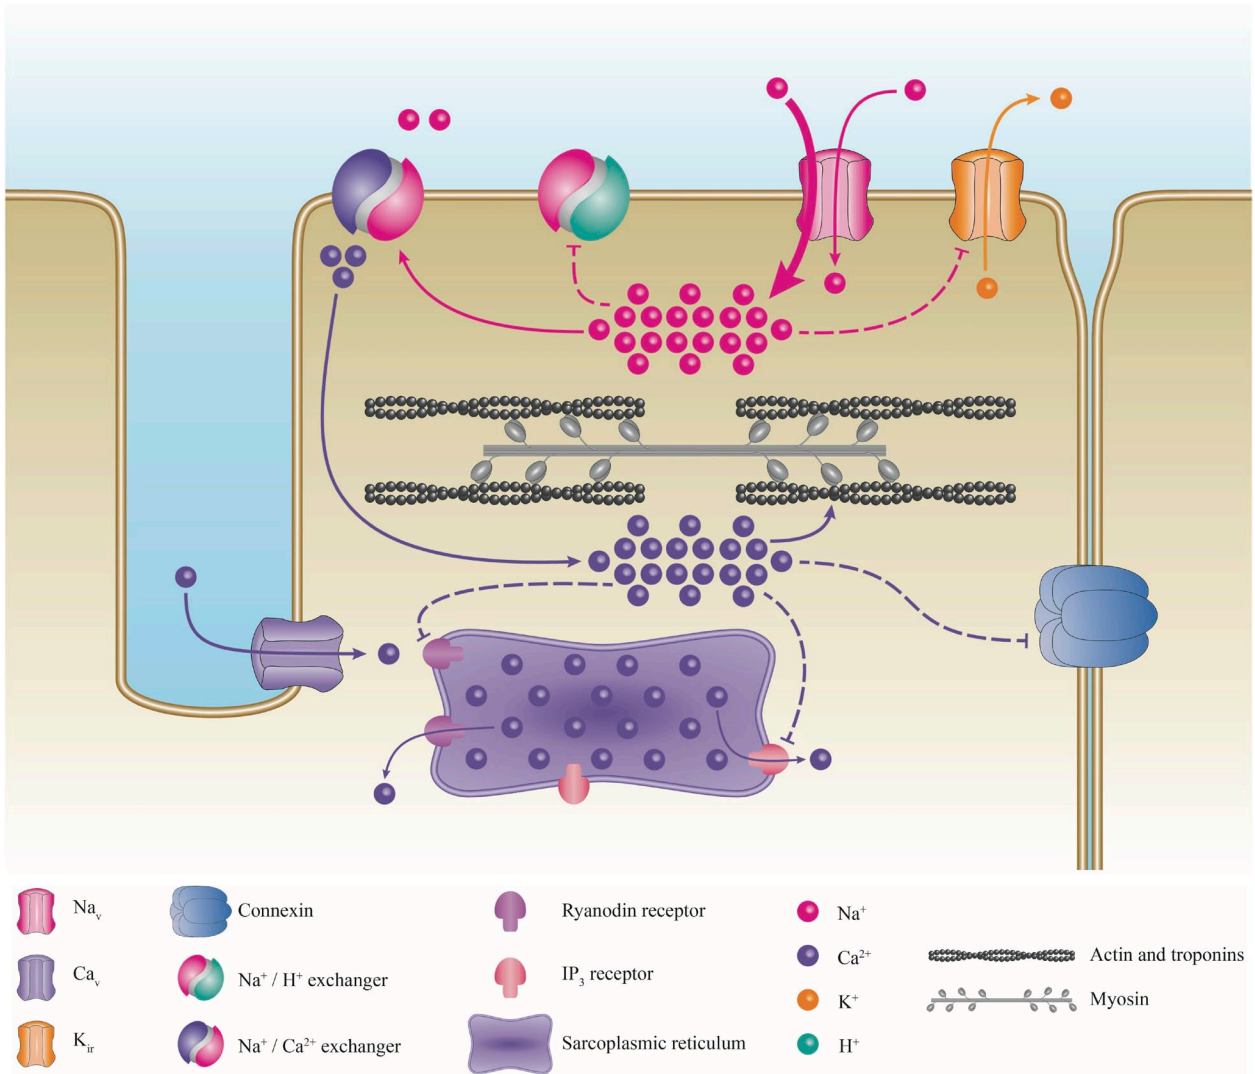

**Figure S3.** Proposed pathological mechanism. Schematic representation of a myocyte with its main ion channels and exchangers. The contractile proteins, sarcoplasmic reticulum, and connexins are shown in gray, purple, and blue, respectively. The appearance of a gating pore current induces an ionic homeostasis imbalance by the activation of several exchangers. The bold pink arrow representing the  $\text{Na}^+$  leak indicates the start point. Figure adapted from Moreau et al. (2014).

TABLE S1  
Divergent biophysical properties of the R222Q and R225W mutations, which have similar clinical phenotypes

| Mutation           | Study                | Biophysical defect |                  |                 |          |                | Clinical phenotype |                 |                   |                    |
|--------------------|----------------------|--------------------|------------------|-----------------|----------|----------------|--------------------|-----------------|-------------------|--------------------|
|                    |                      | Current density    | Activation       | Inactivation    | Recovery | Kinetics       | Window             | Atrial          | Conduction system | Ventricular system |
| R222Q <sup>a</sup> | Cheng et al., 2010   | ↓                  | <i>mV</i><br>-13 | <i>mV</i><br>-4 | Slow     | ≈              | ≈                  | AFib, PAC       | AVB, BBB, CSD     | PVC                |
|                    | McNair et al., 2011  | ND                 | ND               | ND              | ND       | ND             | ND                 | AFib            |                   | Tach, PVC          |
|                    | Nair et al., 2012    | ≈                  | -9               | -7.3            | ≈        | I slow         | ↑                  | AFib            | AVB               | Tach               |
|                    | Laurent et al., 2012 | ≈                  | -11.7            | -5              | ≈        | A Fast, I Fast | ↑                  | AFib, PAC, AFL  | AVB, BBB          | Tach, PVC          |
|                    | Mann et al., 2012    | ≈                  | -6.3             | -6.2            | Slow     | ≈              | ↑                  | AFib, PAC, Brad | BBB               | PVC                |
| R225W <sup>a</sup> | Bezzina et al., 2003 | ↓                  | 14               | 11              | ≈        | ≈              | ND                 |                 | AVB               | Tach               |

↑, increase; ↓, decrease; ≈, not impacted; A Fast, faster activation kinetics; AFib, atrial fibrillation; AFL, atrial flutter; A Slow, slower activation kinetics; AVB, first, second, or third degree atrio-ventricular block; BBB, incomplete right or left bundle branch block; Brad, bradycardia; CSD, conduction system disease; I Fast, faster inactivation kinetics; I Slow, slower inactivation kinetics; ND, not determined; PAC, premature atrial contractions; PVC, premature ventricular contractions; Tach, tachycardia divergences reported in the biophysical properties of the R222Q channel (current density, window current, recovery from inactivation, and current kinetics) have been proposed to be caused by the presence of the H558R polymorphism and the different heterologous expression systems used to study these properties (*Xenopus laevis* oocytes, HEK293, COS, and CHO cells).

<sup>a</sup>The hypothesis of arrhythmia-induced cardiomyopathy seems unlikely. Indeed, for both mutations the age of onset is relatively young (the diagnostic is often before 21 yr, with some cases at 7 yr). Furthermore a patient of <1 yr of age has been described (27). The periods of arrhythmias before death of this patient were of short duration, minimizing the probability of arrhythmia-induced dilatation.

TABLE S2  
Schematic salt-bridge network pattern in the models of the three different conformations of the WT Na<sub>v</sub>1.5 DI domain

| α         | PO4- (top) | E1 (S2) | D2 (S3) | E3 (S2) | PO4- (bottom) |
|-----------|------------|---------|---------|---------|---------------|
| R1 (R219) | X          |         |         |         |               |
| R2 (R222) | X          | X       |         |         |               |
| R3 (R225) |            | X       |         |         |               |
| K4 (K228) |            |         | X       | X       |               |
| β         |            |         |         |         |               |
| R1 (R219) | X          | X       |         |         |               |
| R2 (R222) |            | X       |         |         |               |
| R3 (R225) |            |         | X       | X       |               |
| γ         |            |         |         |         |               |
| R1 (R219) |            | X       |         |         |               |
| R2 (R222) |            |         | X       | X       |               |
| R3 (R225) |            |         |         | X       | X             |
| K4 (K228) |            |         |         |         | X             |

## REFERENCES

- Bezzina, C.R., M.B. Rook, W.A. Groenewegen, L.J. Herfst, A.C. van der Wal, J. Lam, H.J. Jongsma, A.A. Wilde, and M.M. Mannens. 2003. Compound heterozygosity for mutations (W156X and R225W) in SCN5A associated with severe cardiac conduction disturbances and degenerative changes in the conduction system. *Circ. Res.* 92:159–168. <http://dx.doi.org/10.1161/01.RES.0000052672.97759.36>
- Cheng, J., A. Morales, J.D. Siegfried, D. Li, N. Norton, J. Song, J. Gonzalez-Quintana, J.C. Makielski, and R.E. Hershberger. 2010. SCN5A rare variants in familial dilated cardiomyopathy decrease peak sodium current depending on the common polymorphism H558R and common splice variant Q1077del. *Clin. Transl. Sci.* 3:287–294. <http://dx.doi.org/10.1111/j.1752-8062.2010.00249.x>
- Laurent, G., S. Saal, M.Y. Amarouch, D.M. Béziau, R.F. Marsman, L. Faivre, J. Barc, C. Dina, G. Bertaux, O. Barthez, et al. 2012. Multifocal ectopic Purkinje-related premature contractions: A new SCN5A-related cardiac channelopathy. *J. Am. Coll. Cardiol.* 60:144–156. <http://dx.doi.org/10.1016/j.jacc.2012.02.052>
- Mann, S.A., M.L. Castro, M. Ohanian, G. Guo, P. Zodgekar, A. Sheu, K. Stockhammer, T. Thompson, D. Playford, R. Subbiah, et al. 2012. R222Q SCN5A mutation is associated with reversible ventricular ectopy and dilated cardiomyopathy. *J. Am. Coll. Cardiol.* 60:1566–1573. <http://dx.doi.org/10.1016/j.jacc.2012.05.050>
- McNair, W.P., G. Sinagra, M.R. Taylor, A. Di Lenarda, D.A. Ferguson, E.E. Salcedo, D. Slavov, X. Zhu, J.H. Caldwell, and L. Mestroni, and Familial Cardiomyopathy Registry Research Group. 2011. SCN5A mutations associate with arrhythmic dilated cardiomyopathy and commonly localize to the voltage-sensing mechanism. *J. Am. Coll. Cardiol.* 57:2160–2168. <http://dx.doi.org/10.1016/j.jacc.2010.09.084>
- Moreau, A., P. Gosselin-Badaroudine, and M. Chahine. 2014. Biophysics, pathophysiology, and pharmacology of ion channel gating pores. *Front Pharmacol.* 5:53. <http://dx.doi.org/10.3389/fphar.2014.00053>
- Nair, K., R. Pekhletski, L. Harris, M. Care, C. Morel, T. Farid, P.H. Backx, E. Szabo, and K. Nanthakumar. 2012. Escape capture bigeminy: Phenotypic marker of cardiac sodium channel voltage sensor mutation R222Q. *Heart Rhythm.* 9:1681–1688. <http://dx.doi.org/10.1016/j.hrthm.2012.06.029>
